## Long-term dynamic changes of NMDA receptors following an excitotoxic challenge

Alberto Granzotto <sup>1,2,3,\*</sup>, Marco d'Aurora <sup>1</sup>, Manuela Bomba <sup>1,2</sup>, Valentina Gatta <sup>1,4</sup>, Marco Onofri <sup>2</sup>,  
Stefano L. Sensi <sup>1,2,5</sup>

<sup>1</sup> Center for Advanced Sciences and Technology (CAST), University "G. d'Annunzio" of Chieti-Pescara, Chieti, Italy

<sup>2</sup> Department of Neuroscience, Imaging, and Clinical Sciences (DNISC), Laboratory of Molecular Neurology, University "G. d'Annunzio" of Chieti-Pescara, Chieti, Italy

<sup>3</sup> Sue and Bill Gross Stem Cell Research Center, University of California – Irvine, Irvine, USA

<sup>4</sup> Department of Psychological, Health and Territorial Sciences (DISPUTer), Laboratory of Molecular Genetics, University "G. d'Annunzio" of Chieti-Pescara, Chieti, Italy

<sup>5</sup> Center of Advanced Studies and Technology, University "G. d'Annunzio" of Chieti-Pescara, Chieti, Italy

\* To whom correspondence should be addressed:

Alberto Granzotto

Center for Advanced Sciences and Technology (CAST)

University G. d'Annunzio of Chieti-Pescara,

Via Colle dell'Ara, Chieti 66100, Italy.

e-mail: [alberto.granzotto@unich.it](mailto:alberto.granzotto@unich.it)

## Abstract

Excitotoxicity is a form of neuronal death characterized by the sustained activation of N-methyl-D-aspartate receptors (NMDARs) triggered by the excitatory neurotransmitter glutamate. NADPH-diaphorase neurons [also known as nNOS (+) neurons] are a subpopulation of aspiny interneurons, largely spared following excitotoxic challenges. Unlike nNOS (-) cells, nNOS (+) neurons fail to generate reactive oxygen species in response to NMDAR activation, a key divergent step in the excitotoxic cascade. However, additional mechanisms underlying the reduced vulnerability of nNOS (+) neurons to NMDAR-driven neuronal death have not been explored. Using functional, genetic, and molecular analysis in striatal cultures, we demonstrate that nNOS (+) neurons possess distinct NMDAR properties. These specific features are primarily driven by the peculiar redox milieu of this subpopulation. In addition, we found that nNOS (+) neurons exposed to a pharmacological maneuver set to mimic chronic excitotoxicity alter their responses to NMDAR-mediated challenges. These findings suggest the presence of mechanisms providing long-term dynamic regulation of NMDARs that can have critical implications in neurotoxic settings.

Keywords: Calcium, Reactive Oxygen Species, Nitric Oxide Synthase, NADPH diaphorase, Neurodegeneration, Excitotoxicity

## 1 Introduction

2

3 N-methyl-D-aspartate receptors (NMDARs) are ionotropic glutamatergic receptors primarily  
4 permeable to calcium ions ( $\text{Ca}^{2+}$ ). Transient NMDAR-driven  $\text{Ca}^{2+}$  influx mediates essential  
5 physiological or pathological functions (Choi, 1988, 2020; Paoletti et al., 2013). In pathological  
6 conditions, NMDAR overstimulation generates a  $\text{Ca}^{2+}$ -dependent cascade of events encompassing  
7 the production of reactive oxygen and nitrogen species (ROS and RNS, respectively), irreversible  
8 mitochondrial failure, and zinc ( $\text{Zn}^{2+}$ ) mobilization, ultimately leading to neuronal demise (Choi,  
9 2020; Sensi et al., 2009; Wang and Swanson, 2020). The process, termed excitotoxicity (Choi, 1992,  
10 2020; Lau and Tymianski, 2010), is critical for the development of acute or chronic neurological  
11 conditions, like stroke, traumatic brain injury, Alzheimer's disease, Huntington's disease, and  
12 Parkinson's disease (TBI, AD, HD, and PD, respectively) (Bano et al., 2011; Beal, 1998; Choi, 2020;  
13 Hynd et al., 2004).

14 NADPH-diaphorase neurons [also known as nNOS (+) neurons] are a subpopulation of  
15 medium-sized aspiny interneurons, spared following excitotoxic challenges (Granzotto and Sensi,  
16 2015; Koh et al., 1986; Koh and Choi, 1988; Uemura et al., 1990; Weiss et al., 1994). This  
17 subpopulation is characterized by the naïve overexpression of the neuronal form of the enzyme  
18 nitric oxide synthase (NOS, also known as NOS1) (Dawson et al., 1991; Hope et al., 1991). Notably,  
19 early studies have demonstrated nNOS (+) neurons are spared in post-mortem brain samples  
20 obtained from AD, HD, and PD patients (Ferrante et al., 1985; Graveland et al., 1985; Mufson and  
21 Brandabur, 1994), thereby indicating selective resilience to neurodegeneration.

22 In two recent studies, we have exploited the distinct features of these neurons to dissect  
23 molecular mechanisms associated with the resistance to excitotoxic hits (Canzoniero et al., 2013;  
24 Granzotto and Sensi, 2015). These studies have indicated that, in response to NMDA exposures,  
25 nNOS (+) neurons produce intracellular  $\text{Ca}^{2+}$  rises ( $[\text{Ca}^{2+}]_i$ ) that largely overlap with those observed in  
26 the general population of nNOS (-) neurons. However, nNOS (+) neurons fail to generate ROS of  
27 mitochondrial origin, mobilize neurotoxic amount of  $\text{Zn}^{2+}$  from intracellular pools and undergo  
28 mitochondrial damage (Granzotto et al., 2020).

29 This study explored distinct subtle differences in NMDAR composition/distribution in nNOS  
30 (+) neurons and investigated whether these features offer additional neuroprotective effects. Two  
31 lines of evidence support this working hypothesis. First, NMDARs exert different activities according  
32 to their subunit composition and synaptic localization (Hardingham and Bading, 2010; Paoletti et al.,  
33 2013). Second, it is unclear how nNOS (+) neurons cope with the late-stage (also termed  
34 amplification stage) of excitotoxicity, a phase in which damaged neurons spread the toxic cascade to

35 neighboring cells (Zivin and Choi, 1991). Also, not completely clear is the behavior of these cells  
36 upon chronic neurodegenerative conditions like AD and HD (Lewerenz and Maher, 2015).

37

38

## 39 **Materials and methods**

40

### 41 *Chemicals*

42 Culture media and sera were purchased from GIBCO (Thermo Fisher Scientific). Fluorescent  
43 indicators (fluo-4 AM, fura-2 AM, fura-FF AM) were purchased from Molecular Probes (Thermo  
44 Fisher Scientific). NMDA was from Merck Millipore. MK-801 and NBQX were from Alomone. All the  
45 other chemicals, unless otherwise stated, were from Sigma-Aldrich.

46

### 47 *Neuronal striatal cultures*

48 All the procedures involving animals were approved by the institutional Ethics Committee  
49 (47/2011/CEISA/COM) and carried out following national and international laws and policies.  
50 Female mice were caged in groups while male mice were singly housed. Mice were kept on a 12:12  
51 light/dark cycle and had ad libitum access to food and water. All efforts were made to minimize  
52 animal suffering during procedures.

53 Neuronal striatal cultures were prepared as previously described (Granzotto and Sensi,  
54 2015). Briefly, after tissue collection and enzymatic/mechanical dissociation, single-cell striatal  
55 suspension was diluted in Neurobasal medium supplemented with 0.5 mM L-glutamine, 5% horse  
56 serum, 5% fetal bovine serum, 1 × B27 and 0.2% penicillin/streptomycin and plated onto pre-treated  
57 laminin/poly-DL-lysine coated tissue culture plates or dishes. To prevent non-neuronal cell growth  
58 and to obtain near-pure striatal cultures, three days after plating, the medium was supplemented  
59 with 5 μM of cytosine arabinofuranoside (Ara-C). The 7<sup>th</sup> day in vitro (DIV) 25% of the medium was  
60 replaced with fresh Neurobasal. Experiments were performed on cultures between 12 and 18 DIV.

61

### 62 *NADPH-diaphorase staining*

63 NADPH-diaphorase staining was employed for *ex-post* identification of nNOS (+) neurons, as  
64 previously described (Canzoniero et al., 2013; Granzotto and Sensi, 2015). Briefly, after  
65 microfluorimetry experiments, cells were washed with ice-cold Tris-buffer (TBS), fixed in 4%  
66 paraformaldehyde (PFA)/0.1 M phosphate buffer (PBS) for up to 30 minutes at 4° C, rinsed with  
67 large volumes of TBS, and incubated for 30-60 minutes at 37° C with freshly made NADPH-

68 diaphorase staining solution containing (in mM): 100 Tris/HCl, 1.2 sodium azide, 0.2 nitroterazolium  
69 blue, 1 NADPH (Merck-Millipore), and 0.2% Triton X-100, pH 7.2.

70

#### 71 *Sample collection for mRNA analysis*

72 Sample collection for mRNA analysis of nNOS (+) and nNOS (-) neurons was performed as  
73 described elsewhere (Kim et al., 2001) with some modifications. Striatal cultures were rinsed in ice-  
74 cold TBS buffer and fixed in 4% PFA for 15 minutes at 4° C. After PFA removal, cells were thoroughly  
75 washed in TBS, permeabilized with Tris/HCl + 0.2 % Triton X100, and stained with the NADPH-  
76 diaphorase staining method. The staining solution was then removed, and cells were treated for 20-  
77 60 s with Proteinase K (1 µg/ml) in TE buffer (Invitrogen – Thermo Fisher Scientific). Single nNOS (+)  
78 neurons were identified on the stage of an upright microscope, aspirated with a patch pipette, and  
79 transferred into a 1.5 ml conical tube containing mRNA lysis buffer (PicoPure RNA Isolation Kit -  
80 Thermo Fisher Scientific). Similarly, nNOS (-) neurons of similar size and shape were harvested as  
81 controls. 11 to 18 neurons per sample were collected from 3 independent cultures. Neurons were  
82 lysed and processed following manufacturer instructions and total RNA stored at -80° C until further  
83 analysis. All these procedures were performed by employing DEPC water and DNase/RNase-free  
84 chemicals.

85

#### 86 *qRT-PCR analysis*

87 The PicoPure RNA isolation kit (Thermo Fisher Scientific) was employed for total RNA  
88 extraction. One µg of RNA was retro-transcribed with the High-Capacity RNA-to-cDNA Kit (Thermo  
89 Fisher Scientific). qRT-PCR was carried out on an Abi 7900HT Sequencing Detection System (Thermo  
90 Fisher Scientific) in a total volume of 25 µl containing: 2x Maxima SYBR Green/ROX qPCR Master Mix  
91 (Thermo Fisher Scientific), 1 µL of cDNA and 0.3 µM of each primer. *Gapdh* and *Hprt1* were  
92 employed as endogenous controls. Amplification conditions were as follow: 2 minutes at 50 °C,  
93 10 minutes at 95 °C, followed by 40 cycles of 15 seconds at 95 °C and 1 minute at 60 °C. A melting  
94 curve was run to assess the specificity of primers employed. Samples were run in triplicate. The gene  
95 relative fold changes were calculated by the  $\Delta\Delta C_t$  method. The employed primers were: *Gapdh*  
96 (Forward 5'-AACAGCAACTCCCACTCTTC-3', Reverse 5'-GTGGTCCAGGGTTTCTTACTC-3'), *Gpx1* (F 5'-  
97 CGACATCGAACCTGACATAGA-3', R 5'-CAGAGTGCAGCCAGTAATCA-3'), *Grin1* (F 5'-  
98 GTGAACGTGTGGAGGAAGAA-3', R 5'-GTGGAGGTGATAGCCCTAAATG-3'), *Grin2b* (F 5'-  
99 GTCCCTTATCCTCCGTCTTTC-3', R 5'-CGTCGACTCTCTTGTTTGTAG-3'), *Grin2a* (F 5'-  
100 GCTACTGGAGGGCAACTTATAC-3', R 5'-TGGTCTGGCAAGAGAGATTTG-3'), *Hprt1* (F 5'-  
101 GGCCAGACTTTGTTGGATTTG-3', R 5'-CGCTCATCTTAGGCTTTGTATTTG-3'), *Nos1* (F 5'-

102 CTCGGTCTTTGTCTCTCTTTCTT-3', R 5'-GGATGTGATGTGGTAGGGTTAG-3'), *Sod2* (F 5'-  
103 GTAGAGCCTTGCCTGTCTTATG-3', R 5'-AAACCCAGAGGCACCATTAC-3').

104

#### 105 *Bioinformatic analysis*

106 Whole cortex and hippocampus scRNA-Seq data were obtained from the SMART-Seq Allen  
107 Brain Atlas database ([portal.brain-map.org](http://portal.brain-map.org)) and retrieved on March 26<sup>th</sup>, 2020 (Allen Brain Institute,  
108 2019; Lein et al., 2007). nNOS (+) neurons were identified by filtering for neuronal cells showing a  
109 high expression of *Nos1* transcripts (>10.0 FPKM) and the abundant expression of additional nNOS(+)  
110 neuron markers (*Gad*, *Sst*, *Pvalb*, and *Npy*). Two cell clusters (*Sst Chodl\_1*, *Sst Chodl\_2*) were  
111 identified (Supplementary File 1). Differentially expressed gene (DEG) analysis was performed using  
112 Cytosplore Viewer, a publicly available visual analysis system to interrogate single-cell data  
113 published in the Allen Cell Types Database (Tasic et al., 2018). To limit the number of differentially  
114 expressed genes and given the heterogeneity of the neuronal subtypes, the nNOS (+)neuron  
115 transcriptome was compared with the transcriptome of GABAergic neurons (Supplementary File 2).

116

#### 117 *Live-cell imaging*

118 All live-cell imaging experiments were performed on an epifluorescent Zeiss Axio  
119 Examiner.D1 upright microscope equipped with a Xenon lamp-based Cairn Optoscan  
120 monochromator, a Zeiss 20x NA 1.0 W Plan-Apochromat water immersion objective, and selective  
121 fluorescence emission filters. Images were acquired with a Photometrics 16-bit Evolve 512 EMCCD  
122 camera and analyzed with the Molecular Devices Metafluor 7.7 software.

123

#### 124 *Ca<sup>2+</sup><sub>i</sub> imaging experiments*

125 Striatal cultures were loaded for 30 min in the dark at room temperature (RT) with fluo-4  
126 AM (3 μM), fura-2 AM (3 μM), or fura-FF AM (5 μM) plus 0.1% Pluronic F-127 in a HEPES-controlled  
127 saline solution (HCSS) containing (in mM): 120 NaCl, 5.4 KCl, 0.8 MgCl<sub>2</sub>, 1.8 CaCl<sub>2</sub>, 20 HEPES, 15  
128 glucose, 10 NaOH, and pH 7.4. Cells were then washed and incubated in the dark for further 30 min  
129 in HCSS. fluo-4 (excitation λ: 473 ± 20 nm, emission λ: 525 ± 25 nm) fluorescence changes of each  
130 cell were expressed as ΔF/F, where F is the fluorescence intensity at rest and ΔF the relative  
131 fluorescence change (F<sub>x</sub> - F) over time. Similarly, fura-2 and fura-FF (excitation λ: 340 ± 10 nm, 380 ±  
132 10 nm, emission λ: 510 ± 45 nm) fluorescence changes of each cell were acquired as 340/380  
133 emission ratio and expressed as ΔR/R, where R is the fluorescence ratio at rest, and ΔR is the relative  
134 fluorescence ratio change (R<sub>x</sub> - R) over time (Csernansky et al., 1994). During all [Ca<sup>2+</sup>]<sub>i</sub>

135 measurements, TPEN (200 - 500 nM, Merck Millipore) was added to the bathing solution to prevent  
136 interferences of the fluorescent dyes with heavy metal ions (i.e., Zn<sup>2+</sup>) (Grynkiewicz et al., 1985).

137

#### 138 *Analysis of spontaneous Ca<sup>2+</sup><sub>i</sub> transients*

139 Spontaneous Ca<sup>2+</sup><sub>i</sub> changes were acquired at a 5 Hz sampling rate. Raw fluorescence values  
140 of each cell were normalized and analyzed using a custom-made MATLAB script as previously  
141 described (Frazzini et al., 2016; Granzotto et al., 2019). The code calculates the number of transients  
142 per minute (frequency) and the amplitude of the Ca<sup>2+</sup> spikes. Only transients that were 50% above  
143 the baseline were considered.

144

#### 145 *Neuronal striatal culture immunofluorescence*

146 Neuronal striatal cultures were grown on 35 mm glass coverslips. Neurons were washed  
147 thoroughly twice in ice-cold PBS, fixed for 10 min at RT with 4% PFA, permeabilized with PBS + 0.1%  
148 Triton X-100, and then blocked for 1 h at RT with 1% of bovine serum albumin in PBS + 0.1% Tween-  
149 20 (blocking solution). Cells were incubated for 1 h at RT with anti-GluN1 antibody (1:200, Alomone)  
150 and anti-NOS1 antibody (1:50, Santa Cruz Biotechnology) in the blocking solution. After washing in  
151 PBS cultures were stained with species-specific Alexa-conjugated secondary antibodies (Alexa-633,  
152 1:500; Alexa-488, 1:2000, Thermo Fisher Scientific, respectively) for 1.5 h at room temperature in  
153 the dark. Coverslips were then mounted with ProGold-antifade mounting medium (Thermo Fisher  
154 Scientific) on cleaned microscopy slides. Cells were imaged on a Zeiss LSM800 confocal microscope  
155 equipped with a 63x NA 1.40 Plan-Apochromat oil immersion objective and a super-resolution  
156 Airyscan module. Five optical slices (170 nm step size) were acquired for each neuron. After Airyscan  
157 processing and background subtraction, images were transformed as maximum orthogonal  
158 projections of the whole stack using the ZEN software (Zeiss). Images were further analyzed with the  
159 Fiji distribution of ImageJ software as follows. To identify NMDAR-related puncta, GluN1 images  
160 were thresholded, the watershed algorithm was applied to define boundaries between the puncta,  
161 and finally, binary transformed. The obtained image was used as a mask to measure the number,  
162 size, and fluorescent intensity of GluN1 puncta in primary dendrites of nNOS (-) and nNOS (+)  
163 neurons.

164

#### 165 *Assessment of neuronal injury*

166 Neuronal death was assessed with the lactate dehydrogenase (LDH) efflux assay as  
167 previously described (Granzotto and Sensi, 2015).

168

169 *Spectroscopic analysis*

170 To evaluate spectroscopic interferences due to DTNB/DTT application, absorbance spectra  
171 of the two compounds were measured. DTNB (0.5 mM) and DTT (10 mM) were dissolved in HCSS,  
172 and their absorbance spectra measured at room temperature with a SpectraMax 190 plate reader  
173 within the 300 – 600 nm range (5 nm step size). Results are reported as optical density (OD).

174

175 *Statistical analysis*

176 No statistical methods were employed to determine the sample size. All the results are  
177 reported as mean  $\pm$  standard error of the mean (SEM). Comparison between two groups was  
178 performed with Student's t-test or Welch's corrected unpaired t-test, where appropriate. For  
179 comparisons with more than two groups, one-way or two-way ANOVA was performed, where  
180 appropriate, followed by Tukey's post-hoc test. Based on conventional criteria, results were  
181 considered statistically significant when  $p < 0.05$ . \* indicates  $p < 0.05$  and \*\* indicates  $p < 0.01$ .

182

183

184 **Results**

185

186 *Spontaneous Ca<sup>2+</sup> transients of nNOS (+) neurons are identical to the ones of nNOS (-) neurons*

187 Our neuronal cultures exhibit intracellular Ca<sup>2+</sup> transients that depend on synaptic activity  
188 and glutamatergic signaling (Frazzini et al., 2016; Granzotto et al., 2019; Isopi et al., 2015). To  
189 evaluate potential differences in the activation of excitatory signaling between nNOS (-) and nNOS  
190 (+) neurons, we measured spontaneous Ca<sup>2+</sup> transients in the two neuronal populations. Striatal  
191 neurons were loaded with the high-affinity Ca<sup>2+</sup> sensitive dye fluo-4 ( $K_d = 335$  nM), and changes in  
192  $[Ca^{2+}]_i$  were monitored with microfluorimetry. Changes were analyzed in terms of Ca<sup>2+</sup> transient  
193 frequency and mean transient amplitude. nNOS (-) and nNOS (+) neurons exhibited overlapping  
194 patterns of spontaneous activity as far as spiking frequency (Fig. 1A-C) and transient amplitude (Fig.  
195 1D).

196

197 Pharmacological manipulations with tetrodotoxin (TTX, 1  $\mu$ M, to block action potentials),  
198 and NBQX (2,3-dihydroxy-6-nitro-7-sulfamoyl-benzo[f]quinoxaline, 10  $\mu$ M), or dAPV (D-2-amino-5-  
199 phosphonovaleric acid, 100  $\mu$ M) to suppress glutamate-mediated effects demonstrated that changes  
200 in  $[Ca^{2+}]_i$  levels are driven by Ca<sup>2+</sup> entry resulting from action potential firing and activation of  
201 synaptic glutamatergic receptors (Fig. 1E). Experiments performed in a Ca<sup>2+</sup>-free medium  
202 (supplemented with 50  $\mu$ M EDTA) fully abrogated  $[Ca^{2+}]_i$  rises (Fig. 1E), thereby indicating that these  
resulted from Ca<sup>2+</sup> entry and not mobilization of the cation from intraneuronal sites.



203           Thus, taken together, these results indicate that nNOS (-) and nNOS (+) neurons do not show  
204 significant differences in terms of spontaneous glutamatergic receptor activation.

205

206 *Compared to nNOS (-) neurons, nNOS (+) neurons show identical Ca<sup>2+</sup> rises following synaptic and*  
207 *extrasynaptic NMDAR activation*

208           Several lines of evidence indicate that synaptic and extrasynaptic NMDARs (synNMDARs and  
209 exNMDARs, respectively) exert different effects on neuronal functioning, with exNMDARs playing a  
210 key role in the activation of pro-death pathways (Hardingham and Bading, 2010).

211           To evaluate whether the resilience of nNOS (+) neurons to excitotoxic challenges is driven by  
212 differences in exNMDARs, we employed an established pharmacological paradigm that selectively  
213 and sequentially activates synNMDARs and exNMDARs. After baseline fluorescence acquisition, fluo-  
214 4 loaded neurons were exposed to 4-AP (4-aminopyridine, 2.5 mM), a potassium channel blocker.  
215 The maneuver promotes sustained neuronal firing, thereby allowing evaluation of Ca<sup>2+</sup> influx  
216 through synaptic glutamatergic receptors (i.e., synNMDARs). Neurons were then exposed to MK-801  
217 (10 μM, in the presence of 4-AP) to promote complete and irreversible blockade of synNMDARs.  
218 Following a brief washout period, neurons were then challenged with NMDA (50 μM) + glycine (10  
219 μM) to allow Ca<sup>2+</sup> entry through exNMDARs.

220           Analysis of the time course of fluo-4 changes, during synNMDAR activation, revealed no  
221 differences in terms of Ca<sup>2+</sup> rises or cation load between nNOS (-) and nNOS (+) neurons (Fig. 2A-C).  
222 Similarly, no significant differences were observed between the two neuronal populations as far as  
223 exNMDAR-driven [Ca<sup>2+</sup>]<sub>i</sub> changes (Fig. 2D-E). Further analysis of [Ca<sup>2+</sup>]<sub>i</sub> dynamics showed no  
224 differences in the cation influx rate (Fig. 2F).

225           Overall, these findings indicate that nNOS (+) and (-) neurons respond to the activation of  
226 synNMDARs and exNMDARs with overlapping changes in [Ca<sup>2+</sup>]<sub>i</sub>, thereby suggesting that the two  
227 populations are equipped with similar pools of equally functional synNMDARs and exNMDARs.

228

229 *Compared to nNOS (-) neurons, nNOS (+) neurons show reduced transcriptomic and protein*  
230 *expression of the NMDAR subunit 1*

231           Previous studies investigating the expression of NMDAR subunits in nNOS (+) neurons have  
232 provided contrasting results (Augood et al., 1994; Kim et al., 2001; Landwehrmeyer et al., 1995;  
233 Price Jr. et al., 1993; Weiss et al., 1998). To address this question in our system, we performed qRT-  
234 PCR on a set of selected transcripts obtained from pools of nNOS (-) and nNOS (+) neurons (11 to 18  
235 neurons per sample, Fig. 3A). Analysis of qRT-PCR data showed that, compared to nNOS (-), nNOS (+)  
236 neurons exhibit reduced expression of *Grin1*, the gene encoding for the mandatory NMDAR subunit

237 GluN1 (also known as NR1) (Fig. 3B). Other NMDAR candidate gene transcripts, *Grin2a* and *Grin2b*,  
238 show no differences between the two populations (Fig. 3B). Expression levels of other genes coding  
239 for proteins that have been proposed to be involved in the neuroprotection exhibited by nNOS (+)  
240 neurons, like *Sod2* and *Gpx1*, were similar in the two study groups. The *Bcl2* transcript was not  
241 detectable (Fig. 3B and Supplementary Table 1). Of note, *Nos1* transcript (encoding the nNOS  
242 protein) was found significantly increased in nNOS (+) neuron samples, thereby confirming the  
243 selectivity and specificity of our procedure in the isolation of nNOS (+) neurons (Fig. 3B).

244 Our transcriptomic findings were further validated by interrogating mouse scRNA-Seq data  
245 obtained from the Allen Brain Cell Atlas database. We identified two neuronal clusters expressing  
246 specific nNOS (+) markers (*Nos1+*, *Sst+*, *Gad+*, *Pvalb+*, and *Npy+*; Fig. 3C-D and Supplementary File  
247 1). DEGs assessment was performed by comparing the transcriptome of nNOS (+) neurons with the  
248 transcriptome of the broad family of excitatory neurons (Supplementary File 2), a population  
249 particularly vulnerable in neurodegenerative settings (Fu et al., 2018). In line with the aim of the  
250 study, the downstream analysis focused on elucidating differences in terms of glutamatergic  
251 signaling. Supporting our qRT-PCR results, gene ontology (GO) analysis showed that nNOS (+)  
252 neurons display an overall reduction of transcripts associated with excitatory glutamatergic signaling  
253 (Fig. 3E and Supplementary File 2). In line with transcriptomic data, GluN1 reduction was confirmed  
254 by immunofluorescence (IF) in cultured striatal neurons (Fig. 3F-G).

255

256 *Compared to nNOS (-), nNOS (+) neurons show reduced NMDAR-driven  $[Ca^{2+}]_i$  rises following receptor*  
257 *reduction*

258 NMDAR ionic conductance can be modulated by oxidizing/reducing agents (Aizenman et al.,  
259 1989, 1990, 2020). We evaluated, in nNOS (+) and nNOS (-) neurons, NMDAR activity before and  
260 after pharmacological manipulation set to alter the redox status of the receptor (Fig. 4A). After  
261 baseline fluorescence acquisition, fura-2 loaded neurons were challenged with NMDA (25  $\mu$ M) +  
262 glycine (2-5 $\mu$ M). After agonist washout, cells were sequentially exposed to 5,5'-dithiobis(2-  
263 nitrobenzoic acid) (DTNB; 0.5 mM) and to dithiothreitol (DTT; 2-10 mM), and finally to NMDA (25  
264  $\mu$ M) + glycine (2-5 $\mu$ M). The maneuver allows the evaluation of NMDAR activity in conditions of  
265 receptor reduction state (Aizenman et al., 1989). Results were analyzed in fold changes of NMDA-  
266 driven  $Ca^{2+}_i$  rises before and after DTNB-DTT exposures. While DTNB-DTT application resulted in a  
267 net increase of NMDA-driven  $Ca^{2+}_i$  entry in nNOS (-) neurons (Fig. 4B-C), the same maneuver  
268 produced significantly lower  $Ca^{2+}_i$  changes in nNOS (+) neurons (Fig. 4B-C). Similar results were  
269 observed when cultures were exposed to a higher concentration of DTT (10 mM; Fig. 4C). Of note,  
270 DTNB-DTT application did not modify resting  $Ca^{2+}_i$  levels in the two populations (Fig. 4D), thereby

271 indicating that fura-2 signals are not affected by artifactual differences in resting levels of cation  
272 load.

273 Overall, this set of experiments supports the notion that nNOS (+) neurons possess a larger  
274 pool of fully reduced NMDARs when compared to the general population of nNOS (-) neurons.

275

276 *Long-term dynamic changes in NMDAR levels could account for nNOS (+) neurons survival following*  
277 *an excitotoxic challenge*

278 nNOS (+) neurons are spared from acute excitotoxic insults by occluding critical steps in the  
279 cascade (Canzoniero et al., 2013; Granzotto and Sensi, 2015; Granzotto et al., 2020). To evaluate  
280 additional mechanisms of neuroprotection, we set a protocol that mimics long-term excitotoxic  
281 insults and imaged functional changes in nNOS (+) neurons.

282 Serum- and supplement-free Neurobasal medium exchange has been found to produce, in  
283 mature, near-pure cultured neurons, widespread neuronal loss, a phenomenon primarily driven by  
284 L-cysteine-dependent activation of NMDARs (Hogins et al., 2011; Maggioni et al., 2015; Olney et al.,  
285 1990).

286 In line with a previous report (Hogins et al., 2011), we found that medium exchange resulted  
287 in 40% neuronal loss in our cultures 16 to 24 hours after the challenge (Fig. 5A-B). The toxic effect  
288 was abolished when the medium exchange was performed in the presence of dAPV (100  $\mu$ M). Of  
289 note, nNOS (+) neurons were largely spared from the maneuver (Fig. 5A, C and unpublished  
290 observations).

291 Thus, we employed the neurobasal medium change maneuver to dissect changes in cells  
292 exposed to a long-term excitotoxic environment (Hogins et al., 2011; Olney et al., 1990). Neurobasal-  
293 treated cultures were compared with sister cultures challenged in the presence of dAPV. Cultures  
294 with no medium exchange (naïve cells) were used as control. Sixteen to twenty hours after the insult  
295 cultures were loaded with fura-2 and NMDA-driven  $Ca^{2+}_i$  changes evaluated. nNOS (+) and few  
296 surviving nNOS (-) neurons did not show alteration in  $[Ca^{2+}]_i$  while dAPV-treated and naïve sister  
297 cultures produced significant  $[Ca^{2+}]_i$  elevations (Fig. 5C-G). Of note, naïve and dAPV-treated cultures  
298 showed differences in overall cation load (Fig. 5H), thereby suggesting that, in our model, dAPV  
299 exposures positively affect  $Ca^{2+}$  buffering mechanisms.

300 To test if the abolished response to NMDA depends on reduced expression or defective  
301 functioning of the receptor, we exposed our cultures to a pharmacological maneuver that triggers  
302 maximal NMDARs activity. To assess these large  $Ca^{2+}_i$  changes, the low-affinity  $Ca^{2+}$  sensor fura-FF  
303 ( $K_d = 5.5 \mu$ M) was used, and cultures were challenged with NMDA (50  $\mu$ M) + glycine (10  $\mu$ M) in a  
304 magnesium-free medium supplemented with 10 mM  $Ca^{2+}$ . In line with experiments shown in Fig. 5C-

305 E, medium exchange-treated cultures exhibited significantly reduced  $[Ca^{2+}]_i$  amplitudes, overall  
306 cation loads, and cation influx rates compared to the control groups (Fig. 5I-L).

307 Exposures to AMPA or a depolarizing medium (high  $K^+$ , Fig. 5M-Q) failed to generate  $Ca^{2+}_i$   
308 rises, thereby indicating that  $Ca^{2+}_i$  changes were specifically driven by NMDAR activation (Turetsky et  
309 al., 1994).

310

## 311 Discussion

312 The primary purposes of the study were to 1) elucidate the molecular and functional  
313 properties of NMDARs in the subpopulation of nNOS (+) neurons and 2) evaluate effects of chronic  
314 excitotoxic challenges. Our results integrate our previous findings (Canzoniero et al., 2013;  
315 Granzotto and Sensi, 2015) and provide novel insights on the role of NMDARs in nNOS (+) neurons  
316 and may help decipher the role of NMDARs under neurodegenerative conditions. Our study  
317 supports the notion of dynamic control of NMDAR activity at least in part modulated by the  
318 neuronal redox status and the presence of a toxic extracellular milieu.

319

320 NMDAR-driven intracellular  $Ca^{2+}$  overload is a mandatory step in the excitotoxic cascade.  
321 Compelling evidence, however, suggests that receptor subunit arrangements and localization  
322 significantly affect the downstream responses elicited by NMDAR agonists, independently of overall  
323 cation accumulation.

324 The activity of the NMDAR is affected by its subunits (Paoletti et al., 2013). Endogenous  
325 modulators like protons,  $Zn^{2+}$ , and ROS exert an inhibitory effect (Zhu and Paoletti, 2015) while  
326 specific amino acids (glycine and D-serine) or reducing agents potentiate NMDAR activity (Paoletti et  
327 al., 2013). The complexity of NMDARs physiology is exacerbated by the divergent action played by  
328 synNMDARs and exNMDARs. Evidence indicates that exNMDARs promote cell death signaling in  
329 antagonism to synNMDARs that activate anti-apoptotic and neurotrophic pathways (Hardingham et  
330 al., 2002; Hardingham and Bading, 2010). We combined functional, transcriptomic, and imaging data  
331 to gain further insights into the role of NMDAR activation in the nNOS (+) neurons resilience to  
332 excitotoxins.

333 Our results revealed a composite picture.  $Ca^{2+}$  imaging experiments, in line with our previous  
334 reports (Canzoniero et al., 2013; Granzotto and Sensi, 2015), indicate that nNOS (+) neurons possess  
335 equally functional pools of NMDARs when compared to nNOS (-) neurons. In addition, no topological  
336 differences were observed when evaluating synNMDARs and exNMDARs activity in the two neuronal  
337 populations (Fig. 2). Surprisingly, the transcriptomic and histochemical analysis indicated a net  
338 decrease in the expression of NMDA GluN1 subunit (Fig. 3) in nNOS (+) neurons, an important

339 feature considering that, among the seven different NMDAR subunits, GluN1 plays a mandatory role  
340 for the receptor assembling and functioning (Paoletti et al., 2013).

341 To gain some further insight, we focused on two distinguishing features of the NMDARs and  
342 the nNOS (+) subpopulation. NMDARs are modulated by oxidizing and reducing agents, which  
343 decrease or potentiate the amplitude of receptor response to agonists, respectively (Aizenman et  
344 al., 1989, 1990, 2020). On the other hand, nNOS (+) neurons fail to generate ROS of mitochondrial  
345 origin following the activation of NMDARs (Canzoniero et al., 2013; Granzotto and Sensi, 2015). The  
346 phenomenon may be related to increased cellular defenses against oxidative/nitrosative damage  
347 (Gonzalez-Zulueta et al., 1998; Granzotto and Sensi, 2015; Granzotto et al., 2020). This distinct  
348 feature supports the idea that nNOS (+) neurons, by constitutively dealing with an antioxidant  
349 milieu, possess fewer but more reduced, and therefore more functional, NMDARs. This notion is  
350 supported by findings on NMDAR activity in striatal neurons exposed to DNTB/DTT (Fig. 4). This set  
351 of experiments indicates that, upon complete NMDAR reduction, nNOS (+) neurons generate  
352 significantly reduced receptor-mediated  $Ca^{2+}_i$  amplitudes when compared to nNOS (-) neurons (Figs.  
353 4C). Thus, one can speculate that, in nNOS (+) neurons, a cell-autonomous mechanism regulates  
354 *GluN1* expression to balance increased receptor functioning. This intriguing hypothesis is supported  
355 by complementary evidence showing that non-toxic oxidative challenges, which conceivably reduce  
356 NMDAR activity (Aizenman et al., 1990), result in upregulated *GluN1* expression (Betzen et al., 2009;  
357 Hota et al., 2010; Massaad and Klann, 2011). In addition, this view extends recent findings on the  
358 mechanistic liaison between NMDAR activity and the transcription of antioxidant molecules (Baxter  
359 et al., 2015; Papadia et al., 2008) and open the possibility for a feedback loop in which the cell redox  
360 status may affect the transcription of synaptic proteins and vice versa. This hypothesis may also have  
361 implications for disorders in which NMDAR overactivation, increased ROS generation, and  
362 alterations in the transcriptional machinery help to modulate neurodegenerative processes.

363  
364 Moreover, with the limitations of an indirect, population-based approach, our results  
365 confirm that nNOS (+) neurons possess fully operational NMDARs [Figs. 1 and 2 and (Canzoniero et  
366 al., 2013; Granzotto and Sensi, 2015)], thereby arguing against the presence of mechanisms of  
367 resistance that act upstream in the excitotoxic cascade. We also found that changes in NMDARs may  
368 account for nNOS (+) resilience upon chronic excitotoxic hits. This idea is supported by a set of  
369 experiments showing that nNOS (+) neurons fail to respond to NMDA stimulations after prior  
370 exposure to chronic excitotoxic challenges (Fig. 5). The effect was found to be specific to NMDAR-  
371 and not AMPAR- or VGCC- dependent activation and mirrors the attenuation of NMDAR activity  
372 previously reported in an *in vivo* model of TBI (Biegon et al., 2004). In this regard, one can speculate

373 that nNOS (+) neurons, by missing critical steps of the early stages of the excitotoxic cascade  
374 (Canzoniero et al., 2013; Granzotto and Sensi, 2015) activate pathways instrumental for NMDA  
375 removal in the attempt to limit the damage associated with chronic excitotoxicity.

376 Three major evidence supports this idea. First, NMDARs, although reported to be static  
377 when compared to AMPARs, possess endocytic motifs that are required for receptor internalization  
378 and degradation (Roche et al., 2001; Scott et al., 2004). Second, when stimulated to operate at full  
379 capacity, NMDARs generated lower  $[Ca^{2+}]_i$  rises (Figs. 5I-L) when compared to control cultures,  
380 thereby suggesting that fewer receptors are present on the cellular surface. The third argument is  
381 specific to our experimental setting as the activation of the NMDAR glycine (and L-cysteine) binding  
382 site primes the receptor internalization (Nong et al., 2003). In agreement, excitotoxic challenges  
383 performed in the absence of NMDAR co-agonists (i.e., glycine or D-serine) produce different  
384 functional and viability outcomes (Wu et al., 2017). Of note, this proposed mechanism is not limited  
385 to nNOS (+) neurons but can be extended to virtually all those neurons that are spared by our  
386 chronic excitotoxic challenge (Fig. 5A-B). However, we cannot exclude the possibility that these  
387 subsets of neurons fail to respond to NMDA stimulations for reasons unrelated to receptor  
388 expression on the plasma membrane (i.e., negative post-translational modifications, etc.). Another  
389 unsolved question is whether the blockade of NMDAR signaling is a regulated process. Further  
390 studies aimed at manipulating the underlying mechanism will be required.

391

## 392 **Conclusions**

393 Our findings may have intriguing implications for neurological conditions associated with  
394 NMDAR overactivation. The reduced vulnerability of nNOS (+) neurons indicates that the presence of  
395 downstream steps of the cascade can be promising pharmacological targets for neuroprotection  
396 (Granzotto et al., 2020). The phenomenon also can limit the side effects associated with the  
397 pharmacological blockade of NMDARs (Ikonomidou and Turski, 2002). In addition, the reduced  
398 NMDAR responses following chronic excitotoxic hits provide alternative heuristic models to  
399 understand the failure of NMDAR antagonists in clinical trials as well as gain insight into the  
400 mechanisms associated with the neuroprotective effects exerted by preconditioning against  
401 ischemic neuronal death (Aizenman et al., 2000; Dirnagl et al., 2009).

402

## 403 **Author contributions**

404 Conceptualization, Alberto Granzotto and Stefano Sensi; Formal analysis, Alberto Granzotto  
405 and Valentina Gatta; Funding acquisition, Alberto Granzotto, Valentina Gatta and Stefano Sensi;  
406 Investigation, Alberto Granzotto, Marco d'Aurora and Manuela Bomba; Methodology, Alberto

407 Granzotto and Valentina Gatta; Project administration, Stefano Sensi; Visualization, Alberto  
408 Granzotto; Writing – original draft, Alberto Granzotto; Writing – review & editing, Alberto Granzotto,  
409 Valentina Gatta, Marco Onofrj and Stefano Sensi.

410

#### 411 **Acknowledgments**

412 The authors thank all the members of the Molecular Neurology Unit for helpful discussions.

413

#### 414 **Fundings**

415 SLS is supported by research fundings from the Italian Department of Health (RF-2013–  
416 02358785 and NET-2011-02346784-1), from the AIRAzh Onlus (ANCC-COOP), from the Alzheimer's  
417 Association - Part the Cloud: Translational Research Funding for Alzheimer's Disease (18PTC-19-  
418 602325) and the Alzheimer's Association - GAAIN Exploration to Evaluate Novel Alzheimer's Queries  
419 (GEENA-Q-19-596282). AG is supported by the European Union's Horizon 2020 research and  
420 innovation program under the Marie Skłodowska-Curie grant agreement iMIND – No. 84166.

421

422 **References**

423

424 Aizenman, E., Hartnett, K. A., and Reynolds, I. J. (1990). Oxygen free radicals regulate

425 NMDA receptor function via a redox modulatory site. *Neuron* 5, 841–6.

426 doi:10.1016/0896-6273(90)90343-e.

427 Aizenman, E., Lipton, S. A., and Loring, R. H. (1989). Selective modulation of NMDA responses

428 by reduction and oxidation. *Neuron* 2, 1257–63. doi:10.1016/0896-6273(89)90310-3.

429 Aizenman, E., Loring, R. H., Reynolds, I. J., and Rosenberg, P. A. (2020). The Redox Biology of

430 Excitotoxic Processes: The NMDA Receptor, TOPA Quinone, and the Oxidative Liberation of

431 Intracellular Zinc. *Front. Neurosci.* 14, 778. doi:10.3389/fnins.2020.00778.

432 Aizenman, E., Sinor, J. D., Brimecombe, J. C., and Herin, G. A. (2000). Alterations of N-methyl-

433 D- aspartate receptor properties after chemical ischemia. *J. Pharmacol. Exp. Ther.* 295,

434 572–7. Available at: <http://www.ncbi.nlm.nih.gov/pubmed/11046090> [Accessed March 30,

435 2020].

436 Allen Brain Institute (2019). No Title. Available at: <https://portal.brain-map.org/>.

437 Augood, S. J., McGowan, E. M., and Emson, P. C. (1994). Expression of N-methyl-d-aspartate

438 receptor subunit NR1 messenger RNA by identified striatal somatostatin cells. *Neuroscience*

439 59, 7–12. doi:10.1016/0306-4522(94)90093-0.

440 Bano, D., Zanetti, F., Mende, Y., and Nicotera, P. (2011). Neurodegenerative processes

441 in Huntington's disease. *Cell Death Dis.* 2, e228–e228. doi:10.1038/cddis.2011.112.

442 Baxter, P. S., Bell, K. F. S., Hasel, P., Kaindl, A. M., Fricker, M., Thomson, D., et al. (2015). Synaptic

443 NMDA receptor activity is coupled to the transcriptional control of the glutathione system. *Nat.*

444 *Commun.* 6, 6761. doi:10.1038/ncomms7761.

445 Beal, M. F. (1998). Excitotoxicity and nitric oxide in Parkinson's disease pathogenesis. *Ann. Neurol.*

446 44, S110-4. Available at: <http://www.ncbi.nlm.nih.gov/pubmed/9749581> [Accessed August 13,

447 2018].

448 Betzen, C., White, R., Zehendner, C. M., Pietrowski, E., Bender, B., Luhmann, H. J., et al. (2009).

449 Oxidative stress upregulates the NMDA receptor on cerebrovascular endothelium. *Free Radic.*

450 *Biol. Med.* 47, 1212–20. doi:10.1016/j.freeradbiomed.2009.07.034.

451 Bieganski, A., Fry, P. A., Paden, C. M., Alexandrovich, A., Tsenter, J., Shohami, E. (2004) Dynamic changes

452 in N-methyl-d-aspartate receptors after closed head injury in mice: Implications for treatment of

453 neurological and cognitive deficits. *Proc. Natl. Acad. Sci.* 101, 5117–5122.

454 Canzoniero, L. M. T., Granzotto, A., Turetsky, D. M., Choi, D. W., Dugan, L. L., and Sensi, S. L.

455 (2013). nNOS(+) striatal neurons, a subpopulation spared in Huntington's Disease, possess



456 functional NMDA receptors but fail to generate mitochondrial ROS in response to an  
457 excitotoxic challenge. *Front. Physiol.* 4 MAY, 112. doi:10.3389/fphys.2013.00112.

458 Choi, D. W. (1988). Calcium-mediated neurotoxicity: relationship to specific channel types and role  
459 in ischemic damage. *Trends Neurosci.* 11, 465–469. doi:10.1016/0166-2236(88)90200-7.

460 Choi, D. W. (1992). Excitotoxic cell death. *J. Neurobiol.* 23, 1261–1276.  
461 doi:10.1002/neu.480230915. Choi, D. W. (2020). Excitotoxicity: Still Hammering the Ischemic  
462 Brain in 2020. *Front. Neurosci.* 14, 1104. doi:10.3389/FNINS.2020.579953.

463 Csernansky, C. A., Canzoniero, L. M. T., Sensi, S. L., Yu, S. P., and Choi, D. W. (1994). Delayed  
464 application of aurintricarboxylic acid reduces glutamate-induced cortical neuronal injury. *J.*  
465 *Neurosci. Res.* 38, 101–108. doi:10.1002/JNR.490380113.

466 Dawson, T. M., Bredt, D. S., Fotuhi, M., Hwang, P. M., and Snyder, S. H. (1991). Nitric oxide  
467 synthase and neuronal NADPH diaphorase are identical in brain and peripheral tissues. *Proc.*  
468 *Natl. Acad. Sci. U. S. A.* 88, 7797–7801.

469 Dirnagl, U., Becker, K., and Meisel, A. (2009). Preconditioning and tolerance against  
470 cerebral ischaemia: from experimental strategies to clinical use. *Lancet. Neurol.* 8,  
471 398–412.

472 Ferrante, R. J., Kowall, N. W., Beal, M. F., Richardson Jr., E. P., Bird, E. D., and Martin, J. B. (1985).  
473 Selective sparing of a class of striatal neurons in Huntington's disease. *Science (80- ).* 230, 561–  
474 563.

475 Frazzini, V., Guarnieri, S., Bomba, M., Navarra, R., Morabito, C., Marigliò, M. A. A., et al. (2016).  
476 Altered Kv2.1 functioning promotes increased excitability in hippocampal neurons of an  
477 Alzheimer's disease mouse model. *Cell Death Dis.* 7, e2100. doi:10.1038/cddis.2016.18.

478 Gonzalez-Zulueta, M., Ensz, L. M., Mukhina, G., Lebovitz, R. M., Zwacka, R. M., Engelhardt, J. F., et  
479 al. (1998). Manganese superoxide dismutase protects nNOS neurons from NMDA and nitric  
480 oxide-mediated neurotoxicity. *J. Neurosci.* 18, 2040–55.

481 Granzotto, A., Bomba, M., Castelli, V., Navarra, R., Massetti, N., D'Aurora, M., et al. (2019).  
482 Inhibition of de novo ceramide biosynthesis affects aging phenotype in an in vitro model of  
483 neuronal senescence. *Aging (Albany. NY).* 11, 6336–6357. doi:10.18632/aging.102191.

484 Granzotto, A., Canzoniero, L. M. T., and Sensi, S. L. (2020). A Neurotoxic Ménage-à-trois:  
485 Glutamate, Calcium, and Zinc in the Excitotoxic Cascade. *Front. Mol. Neurosci.* 13, 225.  
486 doi:10.3389/fnmol.2020.600089.

487 Granzotto, A., and Sensi, S. L. (2015). Intracellular zinc is a critical intermediate in the  
488 excitotoxic cascade. *Neurobiol. Dis.* 81, 25–37. doi:10.1016/j.nbd.2015.04.010.

- 489 Graveland, G. A., Williams, R. S., and DiFiglia, M. (1985). Evidence for degenerative and  
490 regenerative changes in neostriatal spiny neurons in Huntington's disease. *Science* 227, 770–3.
- 491 Grynkiewicz, G., Poenie, M., and Tsien, R. Y. (1985). A new generation of Ca<sup>2+</sup> indicators with  
492 greatly improved fluorescence properties. *J. Biol. Chem.* 260, 3440–3450.
- 493 Hardingham, G. E., and Bading, H. (2010). Synaptic versus extrasynaptic NMDA receptor  
494 signalling: implications for neurodegenerative disorders. *Nat. Rev. Neurosci.* 11, 682–96.  
495 doi:10.1038/nrn2911.
- 496 Hardingham, G. E., Fukunaga, Y., and Bading, H. (2002). Extrasynaptic NMDARs oppose  
497 synaptic NMDARs by triggering CREB shut-off and cell death pathways. *Nat. Neurosci.* 5,  
498 405–14. doi:10.1038/nn835.
- 499 Hogins, J., Crawford, D. C., Zorumski, C. F., and Mennerick, S. (2011). Excitotoxicity triggered  
500 by Neurobasal culture medium. *PLoS One* 6, e25633. doi:10.1371/journal.pone.0025633.
- 501 Hope, B. T., Michael, G. J., Knigge, K. M., and Vincent, S. R. (1991). Neuronal NADPH diaphorase is  
502 an nitric oxide synthase. *Proc. Natl. Acad. Sci. U. S. A.* 88, 2811–2814.
- 503 Hota, S. K., Hota, K. B., Prasad, D., Ilavazhagan, G., and Singh, S. B. (2010). Oxidative-stress-  
504 induced alterations in Sp factors mediate transcriptional regulation of the NR1 subunit in  
505 hippocampus during hypoxia. *Free Radic. Biol. Med.* 49, 178–91.  
506 doi:10.1016/j.freeradbiomed.2010.03.027.
- 507 Hynd, M. R., Scott, H. L., and Dodd, P. R. (2004). Glutamate-mediated excitotoxicity  
508 and neurodegeneration in Alzheimer's disease. *Neurochem. Int.* 45, 583–595.  
509 doi:10.1016/j.neuint.2004.03.007.
- 510 Ikonomidou, C., and Turski, L. (2002). Why did NMDA receptor antagonists fail clinical trials for  
511 stroke and traumatic brain injury? *Lancet. Neurol.* 1, 383–6. doi:10.1016/s1474-  
512 4422(02)00164-3.
- 513 Isopi, E., Granzotto, A., Corona, C., Bomba, M., Ciavardelli, D., Curcio, M., et al. (2015).  
514 Pyruvate prevents the development of age-dependent cognitive deficits in a mouse  
515 model of Alzheimer's disease without reducing amyloid and tau pathology. *Neurobiol. Dis.*  
516 81, 214–224. doi:10.1016/j.nbd.2014.11.013.
- 517 Kim, D. Y., Kim, S. H., Choi, H. B., Min, C., and Gwag, B. J. (2001). High Abundance of GluR1 mRNA  
518 and Reduced Q/R Editing of GluR2 mRNA in Individual NADPH-Diaphorase Neurons. *Mol. Cell.*  
519 *Neurosci.* 17, 1025–1033. doi:10.1006/MCNE.2001.0988.
- 520 Koh, J. Y., and Choi, D. W. (1988). Vulnerability of cultured cortical neurons to damage by  
521 excitotoxins: differential susceptibility of neurons containing NADPH-diaphorase. *J. Neurosci.* 8,  
522 2153–2163.

- 523 Koh, J. Y., Peters, S., and Choi, D. W. (1986). Neurons containing NADPH-diaphorase are  
524 selectively resistant to quinolinate toxicity. *Science* (80-. ). 234, 73–76.
- 525 Landwehrmeyer, G. B., Standaert, D. G., Testa, C. M., Penney Jr., J. B., and Young, A. B.  
526 (1995). NMDA receptor subunit mRNA expression by projection neurons and  
527 interneurons in rat striatum. *J. Neurosci.* 15, 5297–5307.
- 528 Lau, A., and Tymianski, M. (2010). Glutamate receptors, neurotoxicity and neurodegeneration.  
529 *Pflügers Arch. Eur. J. Physiol.* 460, 525–542. doi:10.1007/s00424-010-0809-1.
- 530 Lein, E. S., Hawrylycz, M. J., Ao, N., Ayres, M., Bensinger, A., Bernard, A., et al. (2007). Genome-  
531 wide atlas of gene expression in the adult mouse brain. *Nature* 445, 168–176.  
532 doi:10.1038/nature05453.
- 533 Lewerenz, J., and Maher, P. (2015). Chronic Glutamate Toxicity in Neurodegenerative Diseases—  
534 What is the Evidence? *Front. Neurosci.* 9, 469. doi:10.3389/fnins.2015.00469.
- 535 Maggioni, D., Monfrini, M., Ravasi, M., Tredici, G., and Scuteri, A. (2015). Neurobasal  
536 medium toxicity on mature cortical neurons. *Neuroreport* 26, 320–324.  
537 doi:10.1097/WNR.0000000000000343.
- 538 Massaad, C. A., and Klann, E. (2011). Reactive oxygen species in the regulation of synaptic  
539 plasticity and memory. *Antioxid. Redox Signal.* 14, 2013–54. doi:10.1089/ars.2010.3208.
- 540 Mufson, E. J., and Brandabur, M. M. (1994). Sparing of NADPH-diaphorase striatal neurons  
541 in Parkinson's and Alzheimer's diseases. *Neuroreport* 5, 705–8.
- 542 Nong, Y., Huang, Y.-Q., Ju, W., Kalia, L. V., Ahmadian, G., Wang, Y. T., et al. (2003). Glycine  
543 binding primes NMDA receptor internalization. *Nature* 422, 302–307.  
544 doi:10.1038/nature01497.
- 545 Olney, J. W., Zorumski, C., Price, M. T., and Labruyere, J. (1990). L-cysteine, a bicarbonate-  
546 sensitive endogenous excitotoxin. *Science* 248, 596–9. doi:10.1126/science.2185543.
- 547 Paoletti, P., Bellone, C., and Zhou, Q. (2013). NMDA receptor subunit diversity: impact on  
548 receptor properties, synaptic plasticity and disease. *Nat. Rev. Neurosci.* 14, 383–400.  
549 doi:10.1038/nrn3504.
- 550 Papadia, S., Soriano, F. X., Léveillé, F., Martel, M.-A., Dakin, K. A., Hansen, H. H., et al. (2008).  
551 Synaptic NMDA receptor activity boosts intrinsic antioxidant defenses. *Nat. Neurosci.* 11, 476–87.  
552 doi:10.1038/nn2071.
- 553 Price Jr., R. H., Mayer, B., and Beitz, A. J. (1993). Nitric oxide synthase neurons in rat brain express  
554 more NMDA receptor mRNA than non-NOS neurons. *Neuroreport* 4, 807–810.

- 555 Roche, K. W., Standley, S., McCallum, J., Dune Ly, C., Ehlers, M. D., and Wenthold, R. J. (2001).  
556 Molecular determinants of NMDA receptor internalization. *Nat. Neurosci.* 4, 794–802.  
557 doi:10.1038/90498.
- 558 Scott, D. B., Michailidis, I., Mu, Y., Logothetis, D., and Ehlers, M. D. (2004). Endocytosis and  
559 degradative sorting of NMDA receptors by conserved membrane-proximal signals. *J. Neurosci.*  
560 24, 7096–109. doi:10.1523/JNEUROSCI.0780-04.2004.
- 561 Sensi, S. L., Paoletti, P., Bush, A. I., and Sekler, I. (2009). Zinc in the physiology and pathology of  
562 the CNS. *Nat. Rev. Neurosci.* 10, 780–91. doi:10.1038/nrn2734.
- 563 Tasic, B., Yao, Z., Graybiel, L. T., Smith, K. A., Nguyen, T. N., Bertagnolli, D., et al. (2018). Shared  
564 and distinct transcriptomic cell types across neocortical areas. *Nature* 563, 72–78.  
565 doi:10.1038/s41586-018-0654-5.
- 566 Turetsky, D. M., Canzoniero, L. M. T., Sensi, S. L., Weiss, J. H., Goldberg, M. P., and Choi, D. W.  
567 (1994). Cortical neurones exhibiting kainate-activated  $co_2+$  uptake are selectively vulnerable to  
568 ampa/kainate receptor-mediated toxicity. *Neurobiol. Dis.* 1, 101–110.  
569 doi:10.1006/nbdi.1994.0013.
- 570 Uemura, Y., Kowall, N. W., and Beal, M. F. (1990). Selective sparing of NADPH-diaphorase-  
571 somatostatin-neuropeptide Y neurons in ischemic gerbil striatum. *Ann. Neurol.* 27, 620–  
572 625. doi:10.1002/ana.410270606.
- 573 Wang, J., and Swanson, R. A. (2020). Superoxide and Non-ionotropic Signaling in  
574 Neuronal Excitotoxicity. *Front. Neurosci.* 4, 861. doi:10.3389/fnins.2020.00861.
- 575 Weiss, J. H., Turetsky, D., Wilke, G., and Choi, D. W. (1994). AMPA/kainate receptor-mediated  
576 damage to NADPH-diaphorase-containing neurons is  $Ca_2+$  dependent. *Neurosci. Lett.* 167, 93–6.
- 577 Weiss, S. W., Albers, D. S., Iadarola, M. J., Dawson, T. M., Dawson, V. L., and Standaert, D. G.  
578 (1998). NMDAR1 glutamate receptor subunit isoforms in neostriatal, neocortical, and  
579 hippocampal nitric oxide synthase neurons. *J. Neurosci.* 18, 1725–34.  
580 doi:10.1523/JNEUROSCI.18-05-01725.1998.
- 581 Wu, Y., Chen, C., Yang, Q., Jiao, M., and Qiu, S. (2017). Endocytosis of GluN2B-containing  
582 NMDA receptors mediates NMDA-induced excitotoxicity. *Mol. Pain* 13,  
583 1744806917701921. doi:10.1177/1744806917701921.
- 584 Zhu, S., and Paoletti, P. (2015). Allosteric modulators of NMDA receptors: multiple sites  
585 and mechanisms. *Curr. Opin. Pharmacol.* 20, 14–23. doi:10.1016/j.coph.2014.10.009.
- 586 Zivin, J. A., and Choi, D. W. (1991). Stroke Therapy. *Sci. Am.* 265, 56  
587 63. doi:10.1038/scientificamerican0791-56.
- 588

589 **Figure legends**

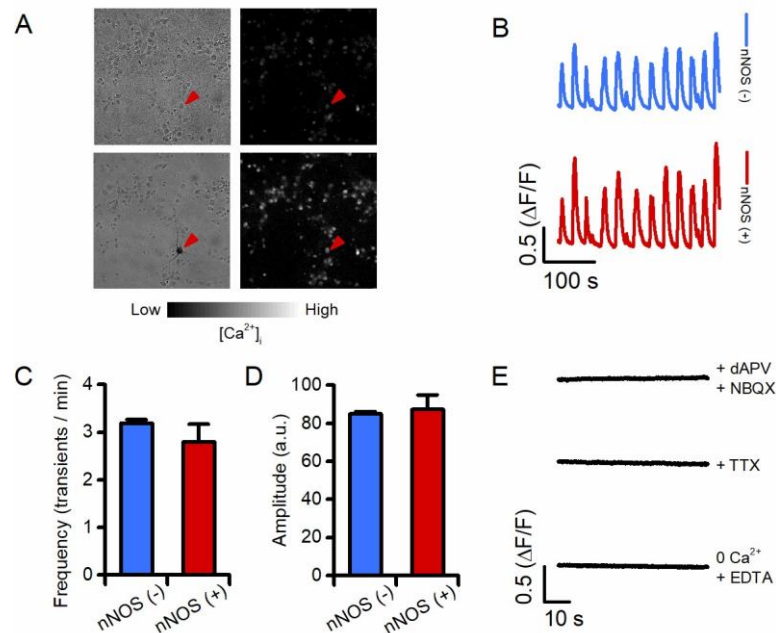

590

591

592 **Figure 1. nNOS (+) and the general population of nNOS (-) neurons show overlapping spontaneous**

593 **Ca<sup>2+</sup> transients.** (A) Striatal neurons were loaded with fluo-4 to monitor spontaneous Ca<sup>2+</sup> transients

594 *in vitro*. Left panels show phase contrast images of the assayed field before (top) and after (bottom)

595 NADPH-diaphorase staining (cell with dark precipitate, red arrowhead); right panels show greyscale-

596 colored images of fluo-4 loaded cultures before (top) and during (bottom) a Ca<sup>2+</sup> transient. Images

597 are representative of 7 independent experiments. (B) Representative time courses of Ca<sup>2+</sup> transients

598 occurring in nNOS (-) and nNOS (+) neurons. (C) Bar graph depicts Ca<sup>2+</sup> transients frequency values

599 obtained in the two populations (transients/min in nNOS (-): 3.19 ± 0.07 vs. 2.8 ± 0.37 in nNOS (+), p

600 = 0.50, n = 616 nNOS (-) vs. n = 10 nNOS (+) neurons from 7 independent experiments). (D) Bar graph

601 depicts Ca<sup>2+</sup> transients amplitude values obtained from the same groups as in C (fluo-4 peak

602 amplitude in nNOS (-): 85.01 ± 1.29 vs. 87.39 ± 7.55 in nNOS (+) neurons, p = 0.81). (E)

603 Representative time courses of Ca<sup>2+</sup> transients occurring in striatal neurons treated with glutamate

604 receptors antagonists (dAPV and NBQX, 100 μM and 10 μM, respectively), TTX (1 μM), or a Ca<sup>2+</sup>-free

605 medium.

606

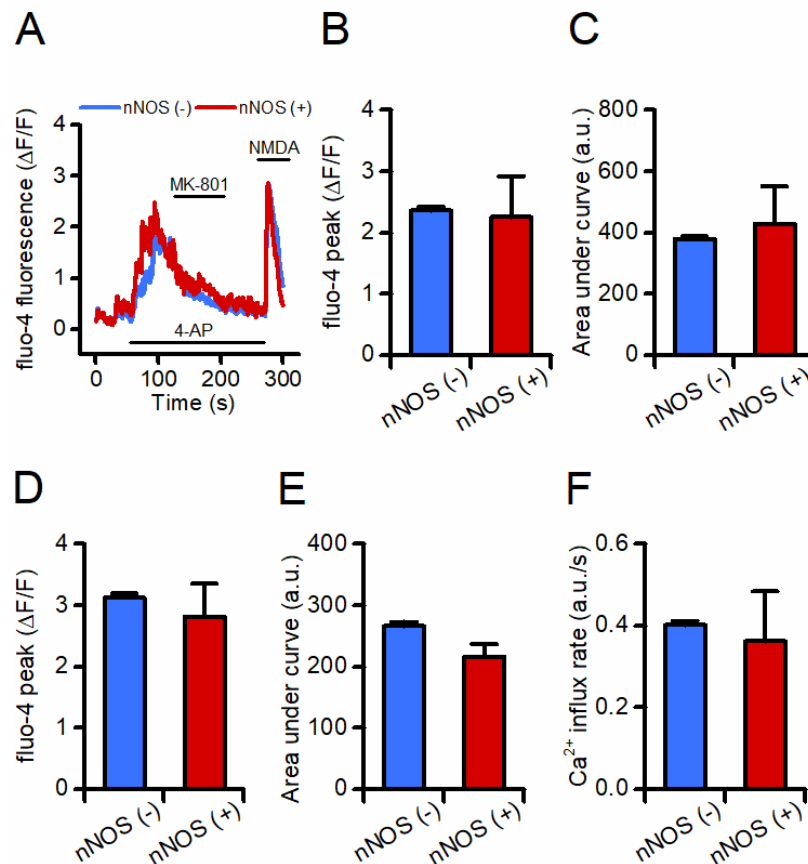

607

608

609 **Figure 2. nNOS (+) and the general population of nNOS (-) neurons show overlapping intracellular**

610 **Ca<sup>2+</sup> rises upon activation of synaptic and extrasynaptic NMDARs.** (A) Representative time courses

611 of fluo-4 loaded nNOS (-) and nNOS (+) striatal neurons exposed to a pharmacological maneuver set

612 to activate synNMDARS and exNMDARS. (B) Bar graph depicts peak of [Ca<sup>2+</sup>]<sub>i</sub> values obtained in the

613 two populations during synNMDAR activation [fluo-4 peak in nNOS (-): 2.36 ± 0.05 vs. 2.25 ± 0.66 in

614 nNOS (+) neurons, p = 0.81, n = 389 nNOS (-) vs. n = 5 nNOS (+) neurons from 4 independent

615 experiments]. (C) Bar graph depicts cumulative [Ca<sup>2+</sup>]<sub>i</sub> changes in the two populations expressed as

616 area under the curve (AUC) of arbitrary units (a.u.) during synNMDAR activation [fluo-4 AUC in nNOS

617 (-): 379.28 ± 8.84 vs. 429.01 ± 122.89 in nNOS (+) neurons, p = 0.53]. (D) Bar graph depicts peak of

618 [Ca<sup>2+</sup>]<sub>i</sub> values obtained in the two populations during exNMDAR activation [fluo-4 peak in nNOS (-):

619 3.12 ± 0.06 vs. 2.81 ± 0.53 in nNOS (+) neurons, p = 0.59]. (E) Bar graph depicts cumulative [Ca<sup>2+</sup>]<sub>i</sub>

620 changes in the two populations during exNMDAR activation [fluo-4 AUC in nNOS (-): 266.08 ± 7.33 vs.

621 216.22 ± 20.61 in nNOS (+) neurons, p = 0.07]. (F) Bar graph depicts Ca<sup>2+</sup> influx rate in the two

622 populations expressed as a.u. changes per second during exNMDAR activation (influx rate in nNOS (-)

623 ) 0.40 ± 0.009 vs. 0.36 ± 0.12 in nNOS (+) neurons, p = 0.63].

624

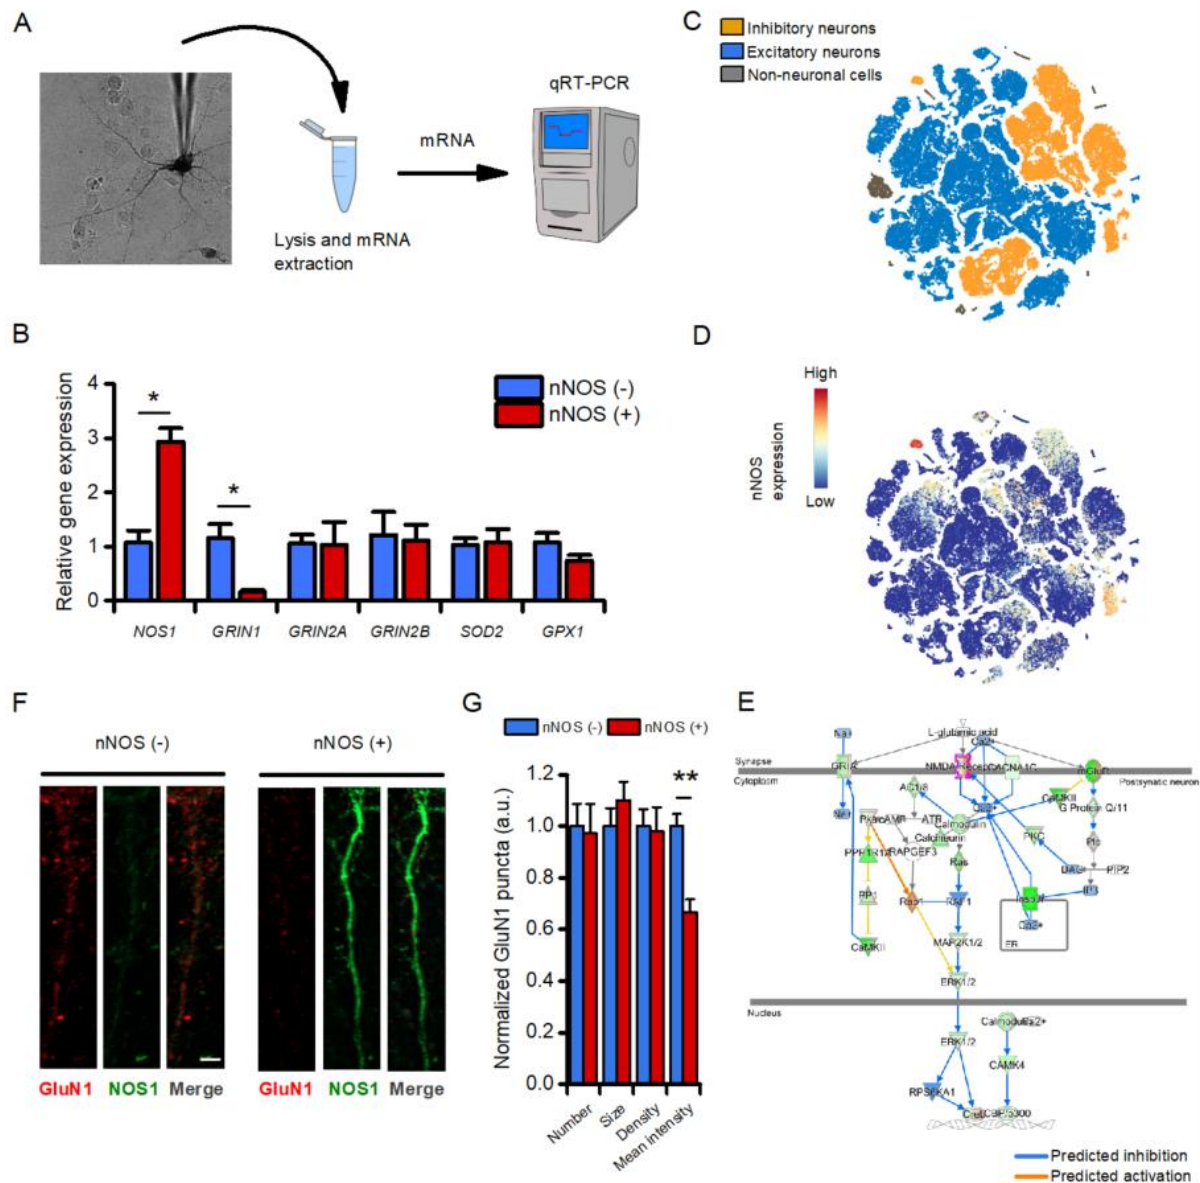

625

626

627 **Figure 3. nNOS (+) neurons show a decreased expression of the NMDA receptor subunit GluN1.**

628 (A) The pictogram illustrates the "patch-like" procedure employed to isolate mRNA obtained from  
 629 single nNOS (+) neurons. The same approach was employed to isolate nNOS (-) neurons employed  
 630 as control. (B) Bar graphs illustrate changes in mRNA levels of the indicated genes measured by real-  
 631 time PCR in nNOS (+) neurons when compared to the general population of nNOS (-) cells (relative  
 632 *Nos1* expression in nNOS (-): 1.07 ± 0.22 vs. 2.92 ± 0.25 in nNOS (+) neurons,  $p < 0.001$ ; relative *Grin1*  
 633 expression in nNOS (-): 1.15 ± 0.25 vs. 0.16 ± 0.02 in nNOS (+) neurons,  $p = 0.005$ ;  $n = 4-5$  replicates).  
 634 No differences were observed in the other tested transcripts (see Supplementary Table 1). (C) t-SNE  
 635 plot of the scRNA-Seq database from the Allen Brain Atlas. Clusters are color-coded based on  
 636 cell classification as inhibitory neurons (yellow), excitatory neurons (blue), or non-neuronal cells (gray).

637 (D) t-SNE plot of the same dataset as in C showing levels of nNOS expression. Please, note the  
638 presence of a high nNOS expressing cluster (top left) identified as *bona fide* nNOS (+) neurons. (E)  
639 The pictogram illustrates the glutamatergic signaling Pathway Activity Analysis. The analysis, based  
640 on the expression of significantly perturbed genes from our dataset, predicts if the pathway is  
641 activated (yellow-orange arrows) or inhibited (blue arrows) in nNOS (+) neurons when compared to  
642 excitatory neurons. Please, note the consistent inhibition of glutamatergic signaling. (F)  
643 Representative super-resolution confocal images of dendrites obtained from striatal nNOS (-) (left  
644 panel) and nNOS (+) neurons and stained with anti-GluN1 (red) and anti-NOS1 (green) antibodies  
645 (scale bar = 2  $\mu$ m). (G) Bar graph depicts quantification of dendritic GluN1-related fluorescent  
646 intensity [normalized GluN1 signal in nNOS (-):  $1.00 \pm 0.04$  vs.  $0.66 \pm 0.05$  in nNOS (+) neurons,  
647  $p < 0.001$ ,  $n = 43 - 44$  dendrites from at least 3 independent experiments].



648

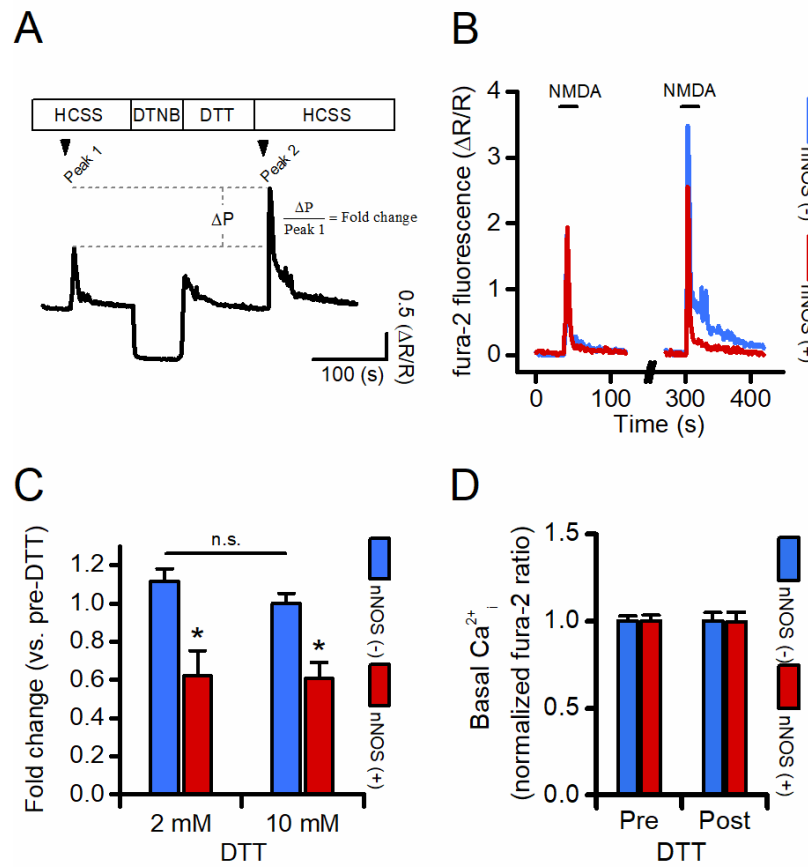

649

650

651 **Figure 4. nNOS (+) neurons show decreased NMDAR-dependent  $Ca^{2+}$  rises following**

652 **pharmacological receptor reduction.** (A) The pictogram illustrates the pharmacological protocol set  
653 to evaluate agonist-dependent changes in  $[Ca^{2+}]_i$  rises before and after NMDAR oxidation/reduction.

654 Please, note that the sharp decrease in fura-2 signal upon DTNB exposure is due to spectroscopic

655 interferences between the probe and the drug (Supplementary fig. 1). (B) Representative time

656 courses of fura-2 loaded nNOS (-) and nNOS (+) striatal neurons exposed to NMDA before (left

657 traces) and after (right traces) full receptor reduction (for clarity, traces during DTNB and DTT

658 exposure were omitted). (C) Bar graphs depict quantification of experiments in B expressed as fold

659 changes in  $[Ca^{2+}]_i$  rises following exposure to 2 mM (left panel) or 10 mM (right panel) DTT in the two

660 populations (DTT 2mM, fura-2 fold change in nNOS: (-)  $1.11 \pm 0.06$  vs.  $0.61 \pm 0.13$  in nNOS (+)

661 neurons,  $p = 0.005$ ,  $n = 389$  nNOS (-) vs.  $n = 9$  nNOS (+) neurons from 7 independent experiments; 10

662 mM, fura-2 fold change in nNOS (-):  $0.99 \pm 0.05$  vs.  $0.60 \pm 0.08$  in nNOS (+) neurons,  $p = 0.002$ ,  $n =$

663 342 nNOS (-) vs.  $n = 7$  nNOS (+) neurons from 5 independent experiments). (D) Bar graph depicts

664 basal  $Ca^{2+}_i$  levels in nNOS (-) and nNOS (+) neurons before and after DTT exposure expressed as

665 normalized fura-2 ratio. n.s. = not significant.

666

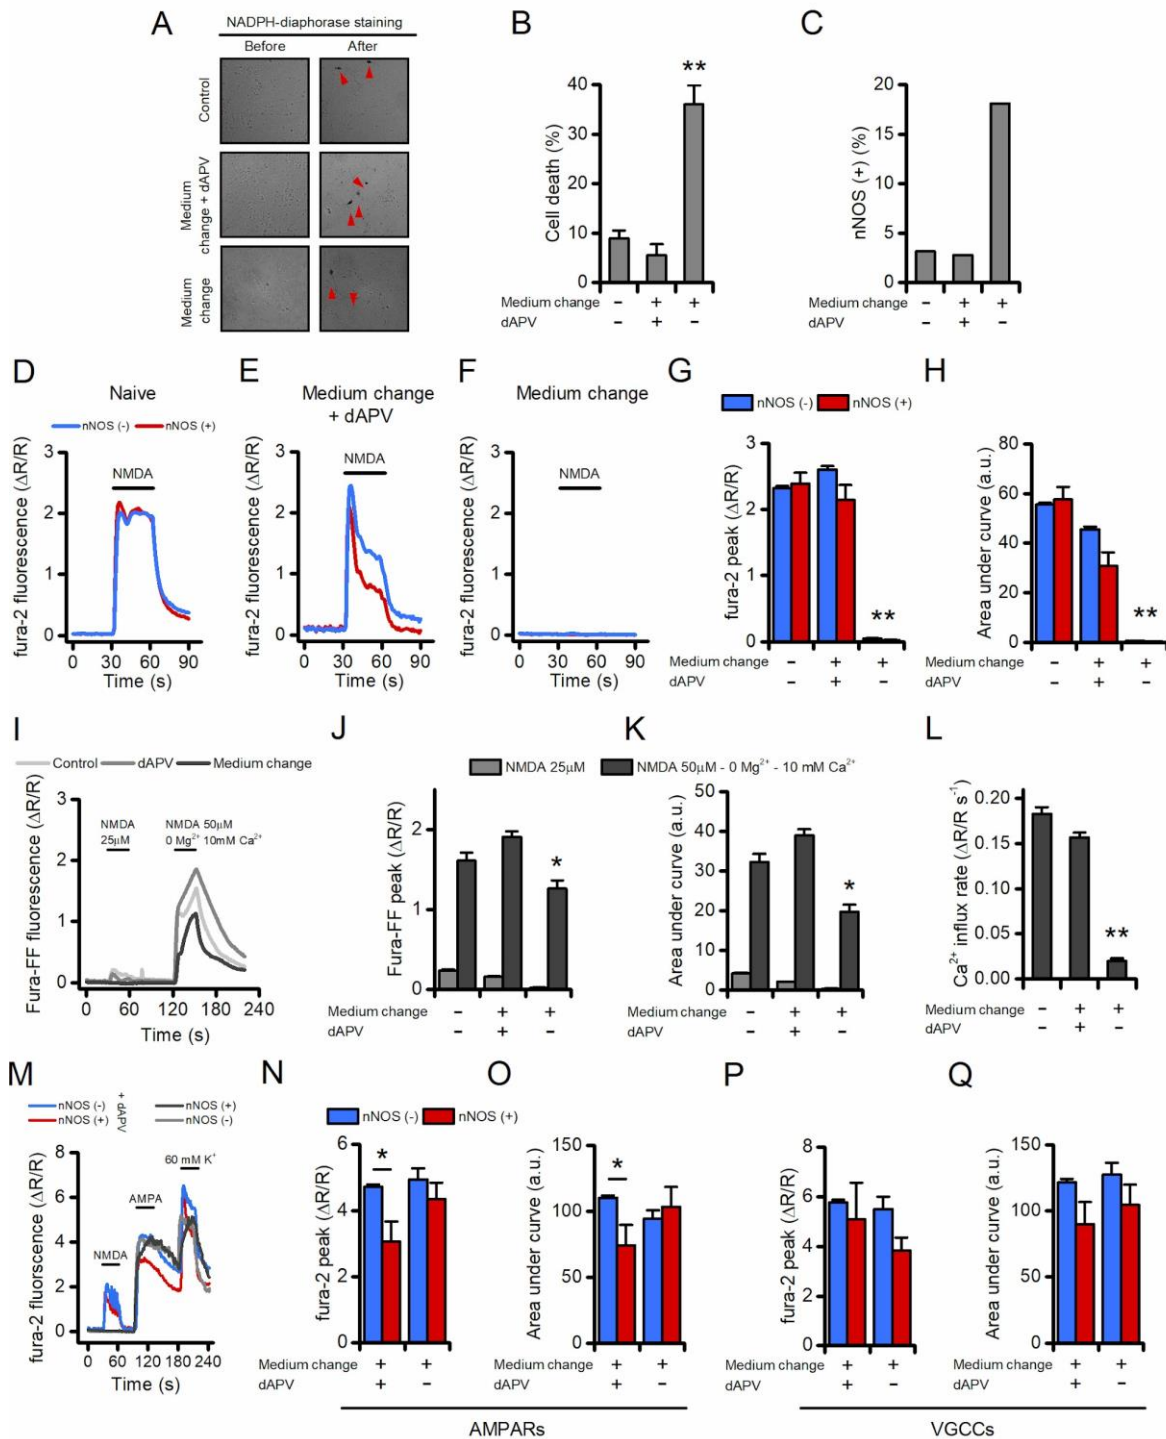

667

668

669 **Figure 5. Neurons spared after an excitotoxic challenge fail to respond to NMDA stimulation.**

670 (A) The pictogram illustrates phase contrast images of untreated (top), medium change + dAPV-  
 671 treated (middle), and medium change-treated (bottom) neuronal striatal cultures before (left) and  
 672 after (right) the NADPH-diaphorase staining. Red arrowheads indicate nNOS (+) neurons. (B) Bar  
 673 graph depicts the vulnerability of striatal cultures exposed to the treatments described in A.

674 Neuronal viability was assessed, with LDH efflux assay, 16 h after the challenge (neuronal death in  
675 naïve neurons:  $8.9 \pm 1.5$  % vs.  $5.4 \pm 2.2$  % in dAPV group vs.  $36.0 \pm 3.8$  % in medium exchange group,  
676  $F(2, 45) = 37.56$ ,  $p < 0.0001$ ). (C) Bar graph depicts the increased number of nNOS (+) neurons,  
677 expressed as % of the live neurons, following medium exchange treatment which is indicative of a  
678 relative sparing of the subpopulation. (D-F) Representative time courses of fura-2 loaded nNOS (-)  
679 and nNOS (+) striatal neurons exposed to NMDA ( $25 \mu\text{M} + 2-5 \mu\text{M}$  glycine) 16-20 h after being  
680 exposed to the indicated treatment. (G) Bar graphs show quantification of fura-2 peak values  
681 obtained from experiments shown in D-F (treatment effect  $F_{(2, 1510)} = 119.7$ ,  $p < 0.0001$ ; cell type  
682 effect  $F_{(2, 1510)} = 0.9163$ ,  $p = 0.33$ ; interaction  $F_{(2, 1510)} = 1.357$ ,  $p = 0.25$ ). (H) Bar graphs show  
683 quantification of cumulative  $[\text{Ca}^{2+}]_i$  changes obtained from experiments shown in D-F (treatment  
684 effect  $F_{(2, 1510)} = 107.7$ ,  $p < 0.0001$ ; cell type effect  $F_{(2, 1510)} = 1.793$ ,  $p = 0.18$ ; interaction  $F_{(2, 1510)} =$   
685  $2.690$ ,  $p = 0.07$ ). (I) Representative time courses of fura-FF loaded neuronal striatal cultures exposed  
686 to  $25 \mu\text{M}$  NMDA ( $2-5 \mu\text{M}$  glycine) or  $50 \mu\text{M}$  NMDA ( $10 \mu\text{M}$  glycine) in a  $\text{Mg}^{2+}$ -free medium  
687 supplemented with  $10 \text{ mM}$   $\text{CaCl}_2$  and assessed 16-20 h after being challenged with the indicated  
688 treatment. (J) Bar graph shows quantification of fura-FF peak values obtained from experiments  
689 shown in I ( $F_{(2, 402)} = 16.11$ ,  $p < 0.0001$ ). (K) Bar graphs show quantification of cumulative  $[\text{Ca}^{2+}]_i$   
690 changes obtained from experiments shown in I ( $F_{(2, 402)} = 33.43$ ,  $p < 0.0001$ ). (L) Bar graph depicts  $\text{Ca}^{2+}$   
691 influx rate in the three treatment groups expressed as a.u. changes per second during the first 5 s of  
692 the  $50 \mu\text{M}$  NMDA stimulation ( $F_{(2, 402)} = 209.2$ ,  $p < 0.0001$ ). (M) Representative time courses of fura-2  
693 loaded nNOS (-) and nNOS (+) striatal neurons sequentially exposed to NMDA ( $25 \mu\text{M} + 2-5 \mu\text{M}$   
694 glycine), AMPA ( $100 \mu\text{M} + \text{cyclothiazide}$ ), or a high  $\text{K}^+$  solution ( $60 \text{ mM}$   $\text{K}^+$ ,  $10 \mu\text{M}$  MK-801,  $10 \mu\text{M}$   
695 NBQX). (N) Bar graph shows quantification of fura-2 peak values obtained from neurons exposed to  
696 AMPA (treatment effect  $F_{(1, 459)} = 2.889$ ,  $p = 0.09$ ; cell type effect  $F_{(1, 459)} = 6.383$ ,  $p = 0.01$ ; interaction  
697  $F_{(1, 459)} = 1.382$ ,  $p = 0.24$ ). (O) Bar graph shows quantification of cumulative  $[\text{Ca}^{2+}]_i$  changes obtained  
698 from neurons exposed to AMPA (treatment effect  $F_{(1, 459)} = 0.4273$ ,  $p = 0.51$ ; cell type effect  $F_{(1, 459)} =$   
699  $1.622$ ,  $p = 0.20$ ; interaction  $F_{(1, 459)} = 4.577$ ,  $p = 0.03$ ). (P) Bar graph shows quantification of fura-2  
700 peak values obtained from neurons exposed to a high  $\text{K}^+$  solution (treatment effect  $F_{(1, 459)} = 1.137$ ,  $p$   
701  $= 0.28$ ; cell type effect  $F_{(1, 459)} = 2.676$ ,  $p = 0.10$ ; interaction  $F_{(1, 459)} = 0.4707$ ,  $p = 0.49$ ). (Q) Bar graph  
702 shows quantification of cumulative  $[\text{Ca}^{2+}]_i$  changes obtained from neurons exposed to a high  $\text{K}^+$   
703 solution (treatment effect  $F_{(1, 459)} = 0.4063$ ,  $p = 0.52$ ; cell type effect  $F_{(1, 459)} = 2.760$ ,  $p = 0.09$ ;  
704 interaction  $F_{(1, 459)} = 0.073$ ,  $p = 0.78$ ).

**Supplementary table 1**

| <b>Gene</b>          | <b>nNOS (-)</b> | <b>nNOS (+)</b> | <b>P</b> |
|----------------------|-----------------|-----------------|----------|
| <b><i>Nos1</i></b>   | 1.07 ± 0.22     | 2.92 ± 0.25     | 0.0003   |
| <b><i>Grin1</i></b>  | 1.15 ± 0.25     | 0.16 ± 0.02     | 0.0272   |
| <b><i>Grin2a</i></b> | 1.05 ± 0.16     | 1.02 ± 0.42     | 0.31     |
| <b><i>Grin2b</i></b> | 1.21 ± 0.42     | 1.11 ± 0.29     | 0.42     |
| <b><i>Sod2</i></b>   | 1.03 ± 0.12     | 1.07 ± 0.24     | 0.42     |
| <b><i>Gpx1</i></b>   | 1.06 ± 0.17     | 0.73 ± 0.1      | 0.08     |
| <b><i>Bcl2</i></b>   | ND              | ND              |          |

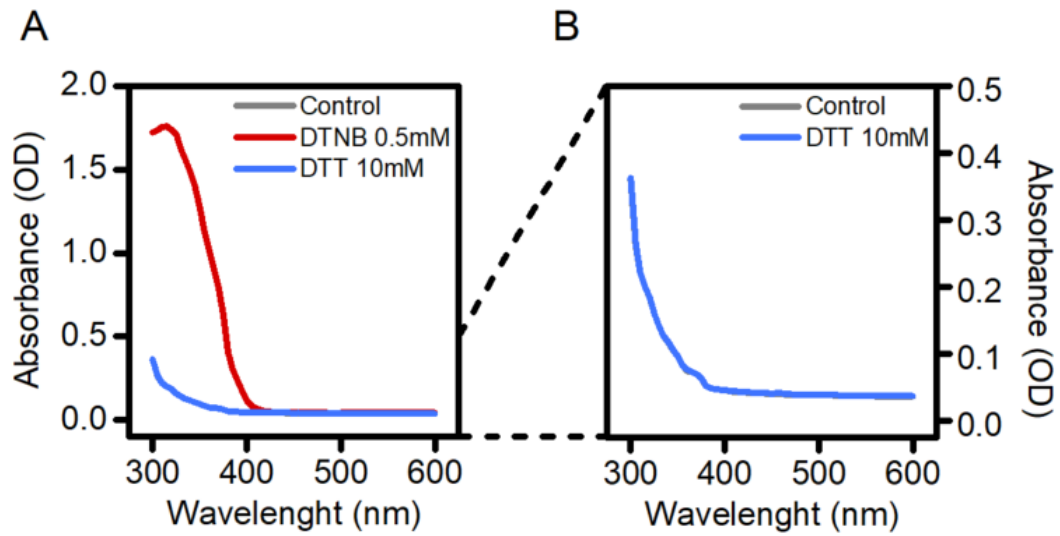

**Supplementary figure 1. DTNB interferes with fura-2 excitation wavelengths.** (A) The pictogram illustrates DTNB (0.5 mM) and DTT (10 mM) absorption spectra recorded in the 300 – 600 nm range (5 nm step size). Please note that DTNB shows maximum absorbance at 340 nm thereby interfering with the short fura-2 excitation wavelength (340/380 nm). (B) The pictogram shows a magnification of DTT spectrum. Please, note the complete overlap between DTT and control medium traces.
